# Supplementary material for: Molecular hydrogen regulates gene expression by modifying the free radical chain reaction-dependent generation of oxidized phospholipid mediators
Source: Springer Nature journal article supplement (doi:10.1038/srep18971), 2016-01-07
Supplement: 41598_2016_BFsrep18971_MOESM1_ESM.pdf [file 41598_2016_BFsrep18971_MOESM1_ESM.pdf]

**Molecular hydrogen regulates gene expression by modifying  
the free radical chain reaction-dependent generation of  
oxidized phospholipid mediators**

**Katsuya Iuchi<sup>1,3</sup>, Akemi Imoto<sup>1,3,4</sup>, Naomi Kamimura<sup>1,3</sup>, Kiyomi Nishimaki<sup>1,3</sup>,  
Takashi Yokota<sup>1</sup>, Harumi Ichimiya<sup>1</sup>, & Shigeo Ohta<sup>1,2,\*</sup>**

*<sup>1</sup>Department of Biochemistry and Cell Biology, Graduate School of Medicine, Nippon  
Medical School, 1-396 Kosugi-machi, Nakahara-ku, Kawasaki-city, Kanagawa  
211-8533, Japan*

*<sup>2</sup>Department of Neuroregenerative Medicine, Juntendo University Graduate School of  
Medicine, 2-1-1 Hongo, Bunkyo-ku, Tokyo 113-8421, Japan*

*<sup>3</sup>These authors contributed equally to this work.*

*<sup>4</sup>Present address: Department of Clinical Chemistry, School of Allied Health Sciences,  
Kitasato University, 1-15-1 Kitasato, Minami-ku, Sagamihara-city, Kanagawa  
252-0373, Japan*

\*Corresponding author: [ohta@nms.ac.jp](mailto:ohta@nms.ac.jp)

Supplementary Figure 1.

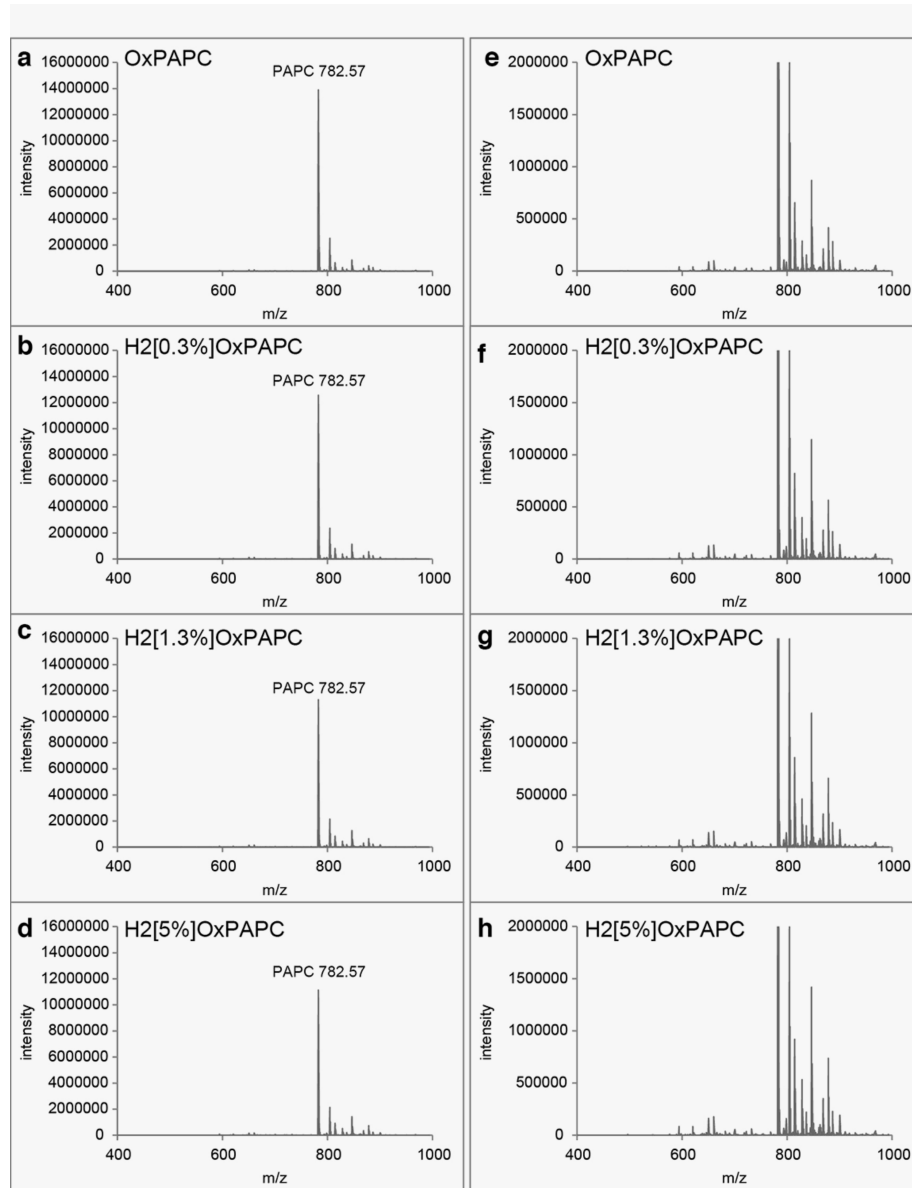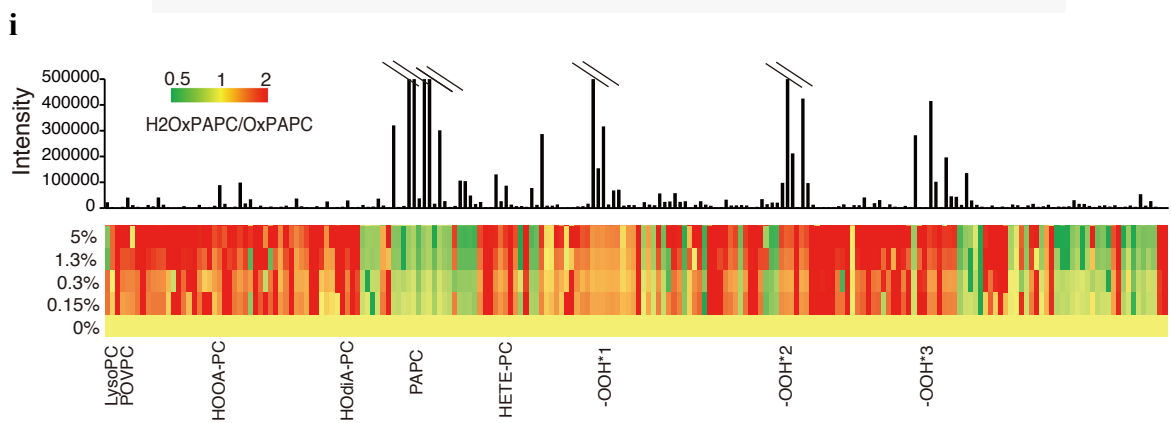

## Supplementary Information

**Supplementary Figure 1. Profiles of mass spectrometry.** PAPC was autoxidized, and subjected to mass spectrometry as described in **Methods**. **(a and e)**, **(b and f)**, **(c and g)**, and **(d and h)** indicate the profiles of OxPAPC, H<sub>2</sub>[0.3%]OxPAPC, H<sub>2</sub>[1.3%]OxPAPC and H<sub>2</sub>[5%]OxPAPC, respectively. Vertical and horizontal axes indicate counts, and m/z, respectively. **(e)**, **(f)**, **(g)**, and **(h)** show the expansion in the vertical axes. **(i, upper)** Mass spectrometric profiles show bands corresponding to OxPAPC species. Oxidized PAPCs are identified according to the molecular mass. Lyso, -OOH\*1, -OOH\*2, and -OOH\*3 indicate lysophosphatidylcholines derived from PAPC, mono-peroxide, di-peroxide, and tri-peroxide of PAPC, respectively. **(i, lower)** Each resulting band (the average of two experiments) is shown in a heat map. Bands representing increased and decreased levels (H<sub>2</sub>OxPAPC vs. OxPAPC) are shown as red and green, respectively, according to the color gradient.

Supplementary Figure 2.

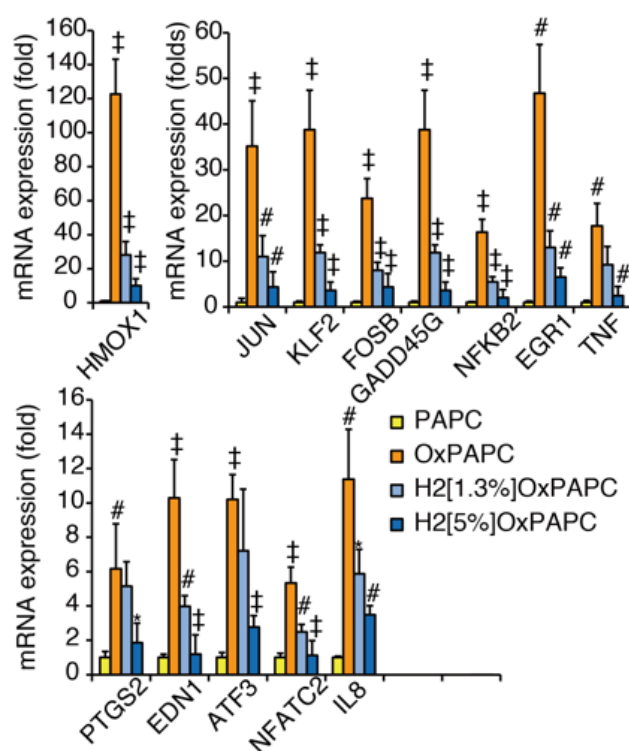

**Supplementary Figure 2. Validation of the expression of the genes selected by microarray analysis by using RT-PCR.** The results of microarray, including marginal genes, were validated by RT-PCR coupled with TaqMan probes. The names of the genes and primer sets are listed in **Supplementary Tables 1** and **2**, respectively. \*, #, and ‡ indicate  $P = 0.03$ ,  $P < 0.01$ , and  $P < 0.001$ , respectively, for OxPAPC vs. PAPC, and H<sub>2</sub>[1.3%]OxPAPC or H<sub>2</sub>[5%]OxPAPC vs. OxPAPC.

## Supplementary Figure 3.

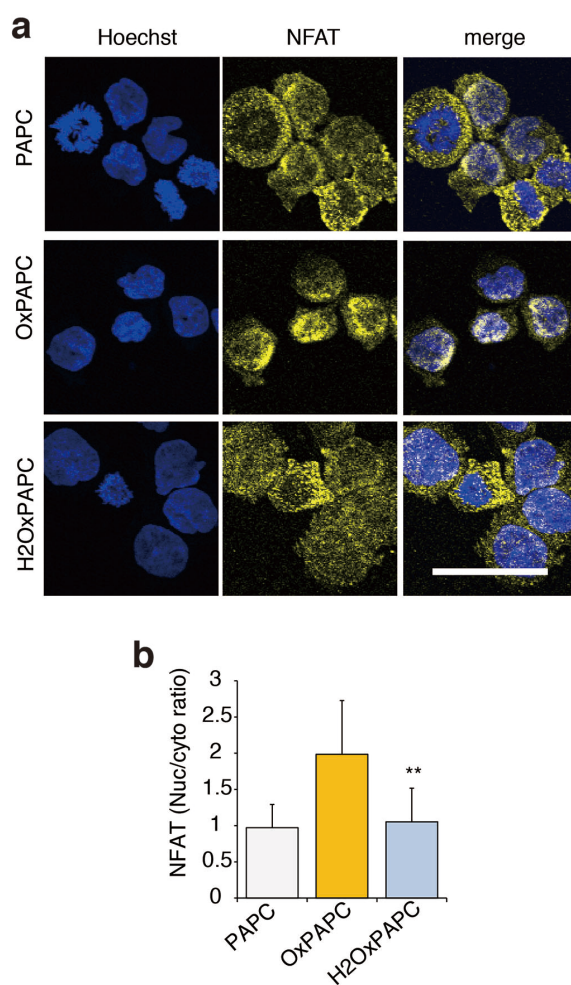

**Supplementary Figure 3. Translocation of NFAT to the nucleus is visualized by immunostaining.** OxPAPC and H<sub>2</sub>OxPAPC were obtained in the absence or presence of 2.5% H<sub>2</sub> as performed in **Figure 3**, and then exposed to THP-1 for 1.5 h. **(a)**The cells were immunostained with anti-NFAT1 (yellow) and counterstained with Hoechst 33342 (blue) as described in **Methods**. Scale bar: 50  $\mu$ m. **(b)**The NFAT-expressing areas were semi-quantified. \*\*  $P < 0.01$  vs. OxPAPC ( $n = 10$ ).

Supplementary Figure 4.

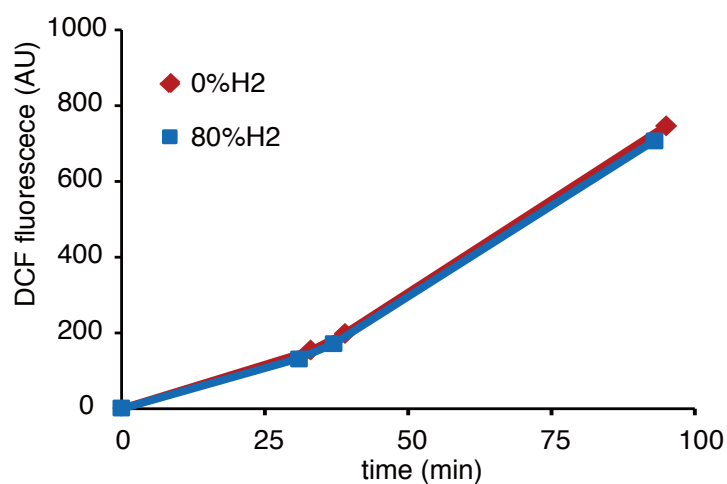

**Supplementary Figure 4. H<sub>2</sub> does not react with AAPH** 2',7' dichlorofluorescein diacetate (DCFH-DA) was used for measuring the radical activity of AAPH. Briefly, DCFH was obtained by hydrolyzing DCFH-DA with 0.01 M aqueous NaOH for 30 min at 37°C in the dark. AAPH (1 mM) and DCFH (10 μM) were added to sodium phosphate buffer (0.1 M, pH 7.2) in the absence or presence of 80% H<sub>2</sub>. The fluorescence intensity of DCFH was measured at 520 nm with excitation at 500 nm.

Supplementary Figure 5.

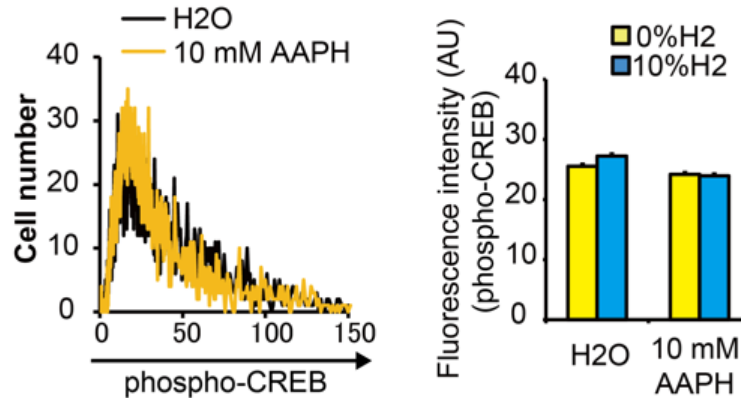

**Supplementary Figure 5. CREB was not activated by a free radical inducer in THP-1.** THP-1 cells ( $1 \times 10^5$  cells/mL) were treated with or without 10 mM AAPH for 3 h in the absence or presence of 10% H<sub>2</sub>. The cells were fixed for 30 min with 10% neutral buffered formalin. After washing, the cells were permeabilized and blocked with 5% bovine serum albumin in Tris buffered saline (pH 7.4) for 30 min. The cells were incubated with anti-phospho-CREB (Ser133) antibodies (1:400 dilution; #9198; Cell Signaling Technology, Danvers, MA, USA) overnight at 4°C, followed by incubation with Alexa Fluor 488-conjugated anti-rabbit antibodies (1:400 dilution; A-11008; Molecular Probes) for 1 h at 25°C. The cells (5,000 cells) were analyzed using flow cytometry using a Cell Lab Quanta flow cytometer (Beckman Coulter, Miami, FL, USA). **(Left)** Representative profiles of flow cytometry in the absence and presence of 10 mM AAPH. **(Right)** Quantification of flow cytometry results.

**Supplementary Table 1 Genes whose expressions were increased by OxPAPC and decreased by H<sub>2</sub>OxPAPC**

| Gene Symbol | Description and Gene accession number                                                                     | *Expression by PAPC<br>**Increase by OxPAPC (vs. PAPC)    **Decrease by H2[1.3%]OxPAPC (vs. OxPAPC)    ***Decrease by H2[5%]OxPAPC (vs. OxPAPC) (fold) |      |      |      | Transcription factor and KEGG Pathway (involved in signal transduction)                                                                                                                                                                                                                                                                                                                                                   | NFA T target Ref. |
|-------------|-----------------------------------------------------------------------------------------------------------|--------------------------------------------------------------------------------------------------------------------------------------------------------|------|------|------|---------------------------------------------------------------------------------------------------------------------------------------------------------------------------------------------------------------------------------------------------------------------------------------------------------------------------------------------------------------------------------------------------------------------------|-------------------|
|             |                                                                                                           | *                                                                                                                                                      | **   | ***  | **** |                                                                                                                                                                                                                                                                                                                                                                                                                           |                   |
| PTGS2       | prostaglandin-endoperoxide synthase 2 (prostaglandin G/H synthase and cyclooxygenase) (PTGS2) [NM_000963] | 40                                                                                                                                                     | 5.7  | 0.25 | 0.34 | NF-kappa B signaling pathway // VEGF signaling pathway // TNF signaling pathway // Retrograde endocannabinoid signaling // Oxytocin signaling pathway                                                                                                                                                                                                                                                                     | 1,2,3             |
| HMOX1       | heme oxygenase 1 (HMOX1) [NM_002133]                                                                      | 310                                                                                                                                                    | 110  | 0.25 | 0.17 | HIF-1 signaling pathway // TNF signaling pathway // Melanogenesis                                                                                                                                                                                                                                                                                                                                                         |                   |
| ATP1B2      | ATPase, Na <sup>+</sup> /K <sup>+</sup> transporting, beta 2 polypeptide (ATP1B2) [NM_001678]             | 31                                                                                                                                                     | 31   | 0.30 | 0.17 | cGMP-PKG signaling pathway // cAMP signaling pathway // Adrenergic signaling in cardiomyocytes // Thyroid hormone signaling pathway                                                                                                                                                                                                                                                                                       |                   |
| PLA2G4C     | phospholipase A2, group IVC (cytosolic, calcium-independent) (PLA2G4C), [NM_003706]                       | 185                                                                                                                                                    | 5.6  | 0.31 | 0.25 | MAPK signaling pathway // Ras signaling pathway // VEGF signaling pathway // Fc epsilon RI signaling pathway // GnRH signaling pathway // Oxytocin signaling pathway                                                                                                                                                                                                                                                      |                   |
| SOST        | sclerostin (SOST) [NM_025237]                                                                             | 22                                                                                                                                                     | 13   | 0.34 | 0.09 | Wnt signaling pathway                                                                                                                                                                                                                                                                                                                                                                                                     |                   |
| JUN         | jun proto-oncogene (JUN) [NM_002228]                                                                      | 155                                                                                                                                                    | 15   | 0.34 | 0.27 | Transcription factor // MAPK signaling pathway // ErbB signaling pathway // cAMP signaling pathway // Wnt signaling pathway // Toll-like receptor signaling pathway // T cell receptor signaling pathway // B cell receptor signaling pathway // TNF signaling pathway // Neurotrophin signaling pathway // GnRH signaling pathway // Estrogen signaling pathway // Oxytocin signaling pathway (American trypanosomiasis) |                   |
| HSPA1A      | heat shock 70kDa protein 1A (HSPA1A) [NM_005345]                                                          | 2550                                                                                                                                                   | 3.8  | 0.35 | 0.48 | MAPK signaling pathway // Estrogen signaling pathway                                                                                                                                                                                                                                                                                                                                                                      |                   |
| PLK2        | polo-like kinase 2 (PLK2) [NM_006622]                                                                     | 235                                                                                                                                                    | 6.21 | 0.36 | 0.21 | FoxO signaling pathway                                                                                                                                                                                                                                                                                                                                                                                                    |                   |
| KLF2        | Kruppel-like factor 2 (KLF2), [NM_016270]                                                                 | 3240                                                                                                                                                   | 16   | 0.39 | 0.21 | Transcription // FoxO signaling pathway                                                                                                                                                                                                                                                                                                                                                                                   | 4                 |
| HSPA1B      | heat shock 70kDa protein 1B (HSPA1B), [NM_005346]                                                         | 6710                                                                                                                                                   | 6.9  | 0.40 | 0.30 | MAPK signaling pathway // Estrogen signaling pathway                                                                                                                                                                                                                                                                                                                                                                      |                   |
| FOSB        | FBJ murine osteosarcoma viral oncogene homolog B (FOSB) [NM_006732]                                       | 132                                                                                                                                                    | 21   | 0.40 | 0.31 | transcription factor                                                                                                                                                                                                                                                                                                                                                                                                      |                   |
| CAMKK1      | calcium/calmodulin-dependent protein kinase kinase 1, alpha (CAMKK1), [NM_032294]                         | 524                                                                                                                                                    | 3.6  | 0.43 | 0.22 | AMPK signaling pathway // Adipocytokine signaling pathway // Oxytocin signaling pathway                                                                                                                                                                                                                                                                                                                                   |                   |
| ID3         | inhibitor of DNA binding 3, dominant negative helix-loop-helix protein (ID3), mRNA [NM_002167]            | 317                                                                                                                                                    | 9.3  | 0.43 | 0.44 | TGF-beta signaling pathway                                                                                                                                                                                                                                                                                                                                                                                                | 5                 |
| JUND        | jun D proto-oncogene (JUND), [NM_001286968]                                                               | 1495                                                                                                                                                   | 4.2  | 0.45 | 0.25 | Transcription factor // MAPK signaling pathway // Osteoclast differentiation                                                                                                                                                                                                                                                                                                                                              |                   |
| SOCS1       | suppressor of cytokine signaling 1 (SOCS1) [NM_003745]                                                    | 350                                                                                                                                                    | 4.0  | 0.46 | 0.31 | Jak-STAT signaling pathway // Insulin signaling pathway // Prolactin signaling pathway                                                                                                                                                                                                                                                                                                                                    | 6                 |
| JUNB        | jun B proto-oncogene (JUNB), mRNA [NM_002229]                                                             | 157                                                                                                                                                    | 6.1  | 0.47 | 0.36 | Transcription factor // TNF signaling pathway                                                                                                                                                                                                                                                                                                                                                                             |                   |
| SGK1        | serum/glucocorticoid regulated kinase 1 (SGK1) [NM_005627]                                                | 159                                                                                                                                                    | 10   | 0.48 | 0.35 | FoxO signaling pathway // PI3K-Akt signaling pathway                                                                                                                                                                                                                                                                                                                                                                      |                   |
| FIGF        | c-fos induced growth factor (vascular endothelial growth factor D) (FIGF), mRNA [NM_004469]               | 27                                                                                                                                                     | 72   | 0.51 | 0.29 | Ras signaling pathway // Rap1 signaling pathway // Cytokine-cytokine receptor interaction // PI3K-Akt signaling pathway // Focal adhesion // Pathways in cancer                                                                                                                                                                                                                                                           |                   |
| GADD45G     | growth arrest and DNA-damage-inducible, gamma (GADD45G), [NM_006705]                                      | 113                                                                                                                                                    | 11   | 0.52 | 0.39 | MAPK signaling pathway // FoxO signaling pathway // Cell cycle // p53 signaling pathway                                                                                                                                                                                                                                                                                                                                   | 7                 |
| FGF3        | fibroblast growth factor 3 (FGF3), mRNA [NM_005247]                                                       | 274                                                                                                                                                    | 15   | 0.54 | 0.26 | MAPK signaling pathway // Ras signaling pathway // Rap1 signaling pathway // PI3K-Akt signaling pathway                                                                                                                                                                                                                                                                                                                   | 8                 |
| RELB        | v-rel avian reticuloendotheliosis viral oncogene homolog B (RELB) [NM_006509]                             | 1627                                                                                                                                                   | 4.3  | 0.54 | 0.37 | MAPK signaling pathway // NF-kappa B signaling pathway                                                                                                                                                                                                                                                                                                                                                                    |                   |
| CTSK        | cathepsin K (CTSK), [NM_000396]                                                                           | 5560                                                                                                                                                   | 3.3  | 0.56 | 0.35 | Toll-like receptor signaling pathway                                                                                                                                                                                                                                                                                                                                                                                      |                   |
| ATF3        | activating transcription factor 3 (ATF3) [NM_001674]                                                      | 215                                                                                                                                                    | 7.6  | 0.56 | 0.27 | Transcription factor                                                                                                                                                                                                                                                                                                                                                                                                      | 9                 |
| BBC3        | BCL2 binding component 3 (BBC3) [NM_014417]                                                               | 9388                                                                                                                                                   | 3.1  | 0.59 | 0.42 | p53 signaling pathway // Hippo signaling pathway                                                                                                                                                                                                                                                                                                                                                                          |                   |
| RASA4B      | RAS p21 protein activator 4B (RASA4B) [NM_001277335]                                                      | 557                                                                                                                                                    | 2.8  | 0.59 | 0.31 | Ras signaling pathway                                                                                                                                                                                                                                                                                                                                                                                                     |                   |
| DGKA        | diacylglycerol kinase, alpha 80kDa [Source:HGNC Symbol;Acc:2849] [ENST00000546995]                        | 148                                                                                                                                                    | 7.3  | 0.60 | 0.45 | Phosphatidylinositol signaling system                                                                                                                                                                                                                                                                                                                                                                                     |                   |



## Supplementary Information

|          |                                                                                                            |      |     |      |      |                                                                                                                                                                                                                                                                                                                                                    |                |
|----------|------------------------------------------------------------------------------------------------------------|------|-----|------|------|----------------------------------------------------------------------------------------------------------------------------------------------------------------------------------------------------------------------------------------------------------------------------------------------------------------------------------------------------|----------------|
| CYP27A1  | cytochrome P450, family 27, subfamily A, polypeptide 1 (CYP27A1) [NM_000784]                               | 668  | 2.9 | 0.60 | 0.51 | PPAR signaling pathway                                                                                                                                                                                                                                                                                                                             |                |
| ATP2B4   | ATPase, Ca <sup>++</sup> transporting, plasma membrane 4 (ATP2B4), [NM_001684]                             | 215  | 2.6 | 0.57 | 0.46 | Calcium signaling pathway // cGMP-PKG signaling pathway // cAMP signaling pathway // Adrenergic signaling in cardiomyocytes                                                                                                                                                                                                                        | 10             |
| NFKB2    | nuclear factor of kappa light polypeptide gene enhancer in B-cells 2 (p49/p100) (NFKB2) [NM_001261403]     | 205  | 3.7 | 0.61 | 0.38 | MAPK signaling pathway // NF-kappa B signaling pathway                                                                                                                                                                                                                                                                                             |                |
| NFATC2   | nuclear factor of activated T-cells, cytoplasmic, calcineurin-dependent 2 (NFATC2) [NM_173091]             | 386  | 3.6 | 0.61 | 0.25 | Transcription factor// cGMP-PKG signaling pathway // Wnt signaling pathway // VEGF signaling pathway // T cell receptor signaling pathway // B cell receptor signaling pathway // Oxytocin signaling pathway                                                                                                                                       |                |
| ITGA10   | integrin, alpha 10 (ITGA10), mRNA [NM_003637]                                                              | 254  | 3.3 | 0.62 | 0.32 | PI3K-Akt signaling pathway                                                                                                                                                                                                                                                                                                                         |                |
| CD86     | CD86 molecule (CD86), transcript variant 2, mRNA [NM_006889]                                               | 4229 | 5.5 | 0.64 | 0.11 | Toll-like receptor signaling pathway                                                                                                                                                                                                                                                                                                               |                |
| RASGRP2  | RAS guanyl releasing protein 2 (calcium and DAG-regulated) [Source:HGNC Symbol;Acc:9879] [ENST00000377494] | 678  | 2.7 | 0.67 | 0.34 | MAPK signaling pathway // Ras signaling pathway // Rap1 signaling pathway // Chemokine signaling pathway // Platelet activation                                                                                                                                                                                                                    |                |
| EDN1     | endothelin 1 (EDN1) [NM_001955]                                                                            | 88   | 5.1 | 0.53 | 0.25 | HIF-1 signaling pathway // TNF signaling pathway                                                                                                                                                                                                                                                                                                   | 3,11,12,13     |
| PMAIP1   | phorbol-12-myristate-13-acetate-induced protein 1 (PMAIP1) [NM_021127]                                     | 7459 | 9.1 | 0.69 | 0.39 | p53 signaling pathway                                                                                                                                                                                                                                                                                                                              |                |
| PPARG    | peroxisome proliferator-activated receptor gamma (PPARG), [NM_138711]                                      | 457  | 3.0 | 0.71 | 0.38 | Transcription factor// PPAR signaling pathway // AMPK signaling pathway                                                                                                                                                                                                                                                                            |                |
| CPT1B    | carnitine palmitoyltransferase 1B (muscle) (CPT1B), [NM_152246]                                            | 4652 | 3.1 | 0.71 | 0.36 | PPAR signaling pathway // AMPK signaling pathway                                                                                                                                                                                                                                                                                                   |                |
| PPP1R12B | protein phosphatase 1, regulatory subunit 12B (PPP1R12B), [NM_002481]                                      | 431  | 3.1 | 0.73 | 0.19 | Oxytocin signaling pathway                                                                                                                                                                                                                                                                                                                         |                |
| FLNA     | filamin A, alpha (FLNA), transcript variant 1, mRNA [NM_001456]                                            | 386  | 2.5 | 0.74 | 0.32 | MAPK signaling pathway                                                                                                                                                                                                                                                                                                                             | 14             |
| FBXO32   | F-box protein 32 (FBXO32), transcript variant 1, mRNA [NM_058229]                                          | 501  | 3.3 | 0.74 | 0.49 | FoxO signaling pathway                                                                                                                                                                                                                                                                                                                             |                |
| MAPK8IP3 | mitogen-activated protein kinase 8 interacting protein 3 (MAPK8IP3), [NM_015133]                           | 3580 | 2.6 | 0.75 | 0.41 | MAPK signaling pathway                                                                                                                                                                                                                                                                                                                             |                |
| EGR1     | early growth response 1 (EGR1), [NM_001964]                                                                | 2210 | 5.2 | 0.84 | 0.58 | Transcription factor                                                                                                                                                                                                                                                                                                                               | 15             |
| TNF      | tumor necrosis factor (TNF), [NM_000594]                                                                   | 2850 | 5.7 | 0.95 | 0.60 | MAPK signaling pathway // NF-kappa B signaling pathway // mTOR signaling pathway // Apoptosis // TGF-beta signaling pathway // Toll-like receptor signaling pathway // NOD-like receptor signaling pathway // RIG-I-like receptor signaling pathway // Fc epsilon RI signaling pathway // TNF signaling pathway // Adipocytokine signaling pathway | 16,17,18,19,20 |
| IL8      | interleukin 8 (IL8) [NM_000584]                                                                            | 91   | 2.3 | PCR  | PCR  | Chemokine signaling pathway // NF-kappa B signaling pathway // Toll-like receptor signaling pathway // NOD-like receptor signaling pathway // RIG-I-like receptor signaling pathway                                                                                                                                                                | 16,21,22,23    |

Gene expression was examined by comprehensive microarray analysis as described in **Methods** (SurePrint G3 Human GE 8x60K v2 Microarray, Agilent Technologies, Santa Clara, CA, USA). Genes that OxPAPC up-regulated (more than 2.5-fold vs. PAPC) and that H<sub>2</sub>[1.3%]OxPAPC and H<sub>2</sub>[5%]OxPAPC down-regulated (less than 0.75-fold and 0.5-fold, respectively, vs. OxPAPC) were selected. When the difference obtained from three tests was not significant ( $P > 0.05$ ), the genes were excluded. Functionally important genes that marginally unfitted the above criteria were added to this table after the validation by semi-quantitative PCR analysis. Transcription factors and target genes to NFAT are listed according to the literature. The contribution to signal transduction was according to the KEGG Pathway Database (<http://www.genome.jp/kegg/pathway.html>).

In the first line of the table; (\*) expression levels treated with PAPC; (\*\*) increase (fold) vs. PAPC; (\*\*\*) decrease (fold) by H<sub>2</sub>[0.3%]OxPAPC vs. OxPAPC and (\*\*\*\*), and decrease (fold) by H<sub>2</sub>[5%]OxPAPC vs. OxPAPC.

**References cited in Supplementary Table 1 suggesting the NFAT targets**

- 1 Mena, M. P. *et al.* NFAT2 regulates COX-2 expression and modulates the integrin repertoire in endothelial cells at the crossroads of angiogenesis and inflammation. *Exp. Cell Res.* **324**, 124-136 (2014).
- 2 Canellada, A., Ramirez, B. G., Minami, T., Redondo, J. M. & Cano, E. Calcium/calcineurin signaling in primary cortical astrocyte cultures: Rcan1-4 and cyclooxygenase-2 as NFAT target genes. *Glia* **56**, 709-722 (2008).
- 3 Sugimoto, T. *et al.* Endothelin-1 induces cyclooxygenase-2 expression via nuclear factor of activated T-cell transcription factor in glomerular mesangial cells. *J. Am. Soc. Nephrol.: JASN* **12**, 1359-1368 (2001).
- 4 Suehiro, J. I. *et al.* Genome-wide approaches reveal functional vascular endothelial growth factor (VEGF)-inducible nuclear factor of activated T cells (NFAT) c1 binding to angiogenesis-related genes in endothelium. *J. Biol. Chem.*, **289**, 29044-29059 (2014).
- 5 Koltsova, E. K. *et al.* Early Growth Response 1 and NF-ATc1 Act in Concert to Promote Thymocyte Development beyond the Selection Checkpoint. *J. Immunol.*, **179**, 4694-4703 (2007).
- 6 Okugawa, S. *et al.* Bacterial flagellin inhibits T cell receptor-mediated activation of T cells by inducing suppressor of cytokine signalling-1 (SOCS-1). *Cell. Microbiol.*, **8**, 1571-1580 (2006).
- 7 Hsiao, H. W. *et al.* Deltex1 is a target of the transcription factor NFAT that promotes T cell energy. *Immunity* **31**, 72-83 (2009).
- 8 Holzmann, K. *et al.* Genomic DNA-chip hybridization reveals a higher incidence of genomic amplifications in pancreatic cancer than conventional comparative genomic hybridization and leads to the identification of novel candidate genes. *Cancer Res.*, **64**, 4428-4433 (2004).
- 9 Dziunycz, P. J. *et al.* The oncogene ATF3 is potentiated by cyclosporine A and ultraviolet light A. *J. Invest. dermatol.*, **134**, 1998-2004 (2014).
- 10 Kosiorek, M., Podszywalow-Bartnicka, P., Zylinska, L. & Pikula, S. NFAT1 and NFAT3 cooperate with HDAC4 during regulation of alternative splicing of PMCA isoforms in PC12 cells. *PLoS one* **9**, e99118 (2014).
- 11 Strait, K. A., Stricklett, P. K., Kohan, R. M. & Kohan, D. E. Identification of two nuclear factor of activated T-cells (NFAT)-response elements in the 5'-upstream regulatory region of the ET-1 promoter. *J. Biol. Chem.*, **285**, 28520-28528 (2010).
- 12 Van Sant, C. *et al.* Endothelin signaling in osteoblasts: global genome view and implication of the calcineurin/NFAT pathway. *Mol. Cancer Ther* **6**, 253-261 (2007).
- 13 Kawamura, T. *et al.* Endothelin-1-dependent nuclear factor of activated T lymphocyte signaling associates with transcriptional coactivator p300 in the activation of the B cell leukemia-2 promoter in cardiac myocytes. *Cir. Res.*, **94**, 1492-1499 (2004).
- 14 Hayashi, K. & Altman, A. Filamin A Is Required for T Cell Activation Mediated by Protein Kinase C. *J. Immunol.*, **177**, 1721-1728 (2006).
- 15 Susilowati, H. *et al.* Intermedilysin induces EGR-1 expression through calcineurin/NFAT pathway in human cholangiocellular carcinoma cells. *Biochem. Biophys. Res. Commu.* **404**, 57-61 (2011).
- 16 Robbs, B. K., Lucena, P. I. & Viola, J. P. The transcription factor NFAT1 induces apoptosis through cooperation with Ras/Raf/MEK/ERK pathway and upregulation of TNF-alpha expression. *Biochim. Biophys. Acta* **1833**, 2016-2028 (2013).

## Supplementary Information

- 17 Rao, A., Luo, C. & Hogan, P. G. Transcription factors of the NFAT family: regulation and function. *Annu. Rev. Immunol.*, **15**, 707-747 (1997).
- 18 Goldfeld, A. E., McCaffrey, P. G., Strominger, J. L. & Rao, A. Identification of a novel cyclosporin-sensitive element in the human tumor necrosis factor alpha gene promoter. *J. Exp. Med.*, **178**, 1365-1379 (1993).
- 19 McCaffrey, P. G., Goldfeld, A. E. & Rao, A. The role of NFATp in cyclosporin A-sensitive tumor necrosis factor-alpha gene transcription. *J. Biol. Chem.*, **269**, 30445-30450 (1994).
- 20 Oum, J. H. *et al.* Molecular mechanism of NFAT family proteins for differential regulation of the IL-2 and TNF-alpha promoters. *Mol. Cells* **13**, 77-84 (2002).
- 21 Bochkov, V. N. *et al.* Generation and biological activities of oxidized phospholipids. *Antioxidant. Redox Sig.* **12**, 1009-1059 (2010).
- 22 Maldonado-Perez, D. *et al.* Prokineticin 1 modulates IL-8 expression via the calcineurin/NFAT signaling pathway. *Biochim. Phys. Acta* **1793**, 1315-1324 (2009).
- 23 Okamoto, S. *et al.* The interleukin-8 AP-1 and kappa B-like sites are genetic end targets of FK506-sensitive pathway accompanied by calcium mobilization. *J. Biol. Chem.*, **269**, 8582-8589 (1994).

**Supplementary Table 2 Nucleotide sequences of primer sets and TaqMan probes**

| Gene    | Forward primer              | Reverse primer           | TaqMan probe                 |
|---------|-----------------------------|--------------------------|------------------------------|
| Human   |                             |                          |                              |
| HMOX1   | CCACCAAGTTCAAGCAGCTC        | CTGACTGCGGGAGTCATCTC     | ACCGTCCC GCATGAACTCCC        |
| JUN     | CAAGAACGTGACAGATGAGCAG      | AGCGTGTTCTGGCTGTGC       | CACGAAGCCCTCGGCGAAGCCC       |
| KLF2    | AAGTGGCATCTTCTCTCCCA        | AATGCCGCAGACAGTACAAA     | CAAGGCATCACAAGCCTCGATCC      |
| FOSB    | GTGAGTGTGTGAGCGCTTCT        | AGACAGGCTGAGCCAGAGTT     | CACGTTGGCCCTCAAAGCGA         |
| GADD45G | GCGAGAACGACATCGACATA        | TTCGAAATGAGGATGCAGTG     | ACGATAGCCGCCAGCCGCT          |
| NFKB2   | TGATAGCGACTCGGACTCTG        | GAGCAGCATTTAGCAGCAAG     | ACACCCGAAGCAGCTCCGG          |
| EGR1    | GAGATGGCCATAGGAGAGGA        | AAGTGGGCAGAAAGGATTGT     | TGGCTCTGAGAACCTCCATCTGACC    |
| TNF     | TCTTCTCGAACCCGAGTGA         | CCTCTGATGGCACCACCAG      | TAGCCCATGTTGTAGCAAACCTCAAGCT |
| PTGS2   | GCTCAAACATGATGTTTGCATTC     | GCTGGCCCTCGCTTATGA       | TGCCCAGCACTTCACGCATCAGTT     |
| EDN1    | ACATTGGTGACAGACCTTCG        | GTCAGGAACCAGCAGAGGAT     | CCCTGTGGCCGACTCTGCAC         |
| ATF3    | GCCGAAACAAGAAGAAGGAG        | GCTCCTCAATCTGAGCCTTC     | CCGACTCTTCTGCAGGCACTCC       |
| NFATC2  | AATGGAATGGATGCAAATGA        | TGCTAAGCTTGTCCTCAACAG    | AGCCTCGGTCTGCTCAGGCC         |
| IL8     | GCCAACACAGAAATTATTGTAAAGCTT | AATTCTCAGCCCTCTTCAAAACTT | AGAGCTCTGCTGGACCCCAAGGAAAAC  |
| GAPDH   | GGGAAGGTGAAGGTCGGA          | GCAGCCCTGGTGACCAG        | CAACGGATTGGTCGTATTGGGCG      |
| Mouse   |                             |                          |                              |
| EGR1    | GAGGAGATGATGCTGCTGAG        | TGCTGCTGCTGCTATTACC      | AGTTCCTCGGTGCTGCCGAA         |
| ATF3    | CAACAGAGGATGGACGACAC        | TGTAGCCAAGGACAAAGCTG     | TGCCCAGGGTCTTCTCTGCTGC       |
| PTGS2   | AGAACCTGCAGTTTGTGTG         | GCTCCTGCTTGAGTATGTCG     | TCTGTTGTGCTCCCGAAGCCA        |
| TNF     | TCGTAGCAAACCAAGTG           | TTGAGATCCATGCCGTTG       | AGGAGCAGCTGGAGTGGCTGAGC      |
| GAPDH   | CATCACTGCCACCCAGAAGA        | ATGTTCTGGGCAGCC          | TGGATGGCCCTCTGGAAAGCTG       |
